# Supplementary material for: The hexokinase “HKDC1” interaction with the mitochondria is essential for liver cancer progression
Source: PubMed Central journal article supplement (PMC9334634; doi:10.1038/s41419-022-04999-z), 2022-07-28

# Supplementary Fig 1

**A**

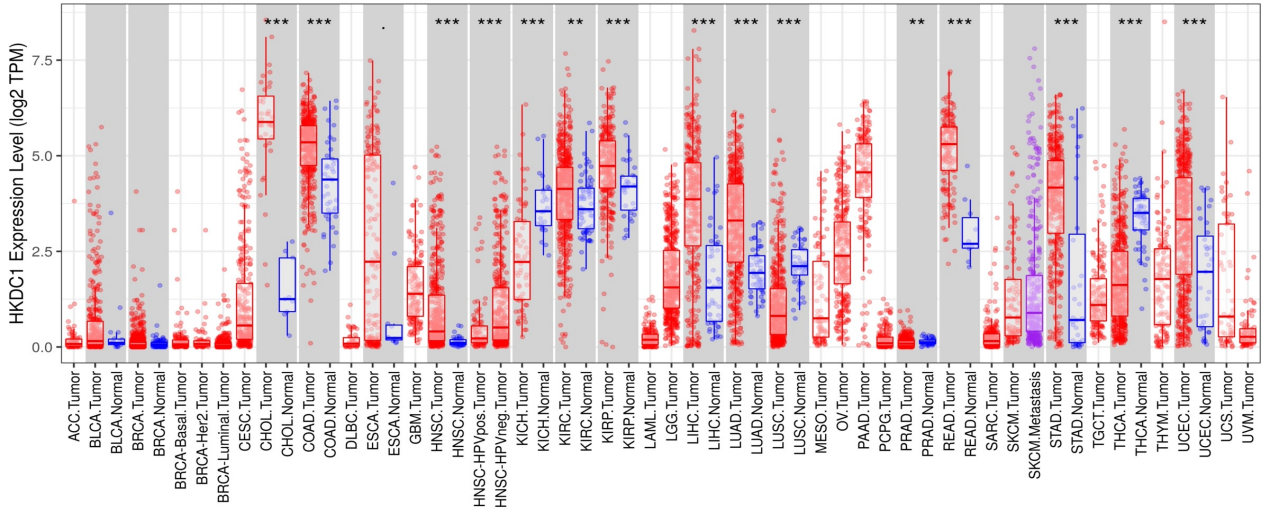

**B**

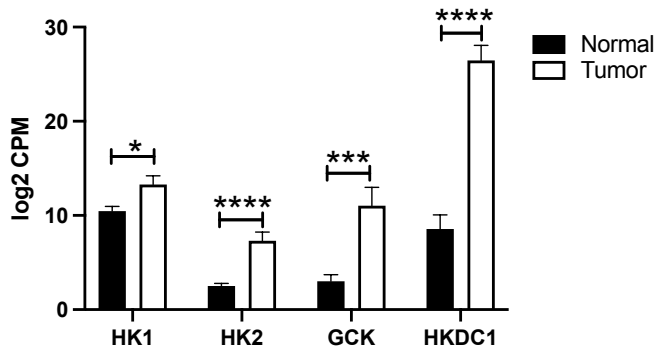

**C**

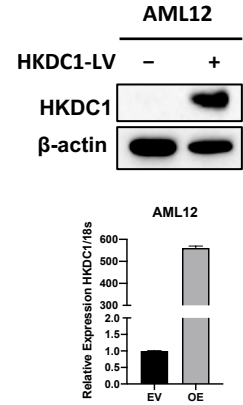

**D**

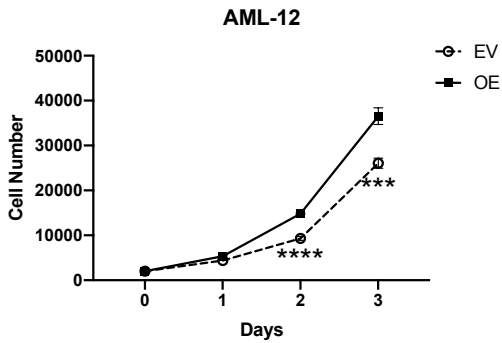

**E**

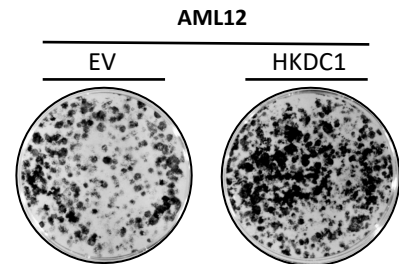

# Supplementary Fig 2

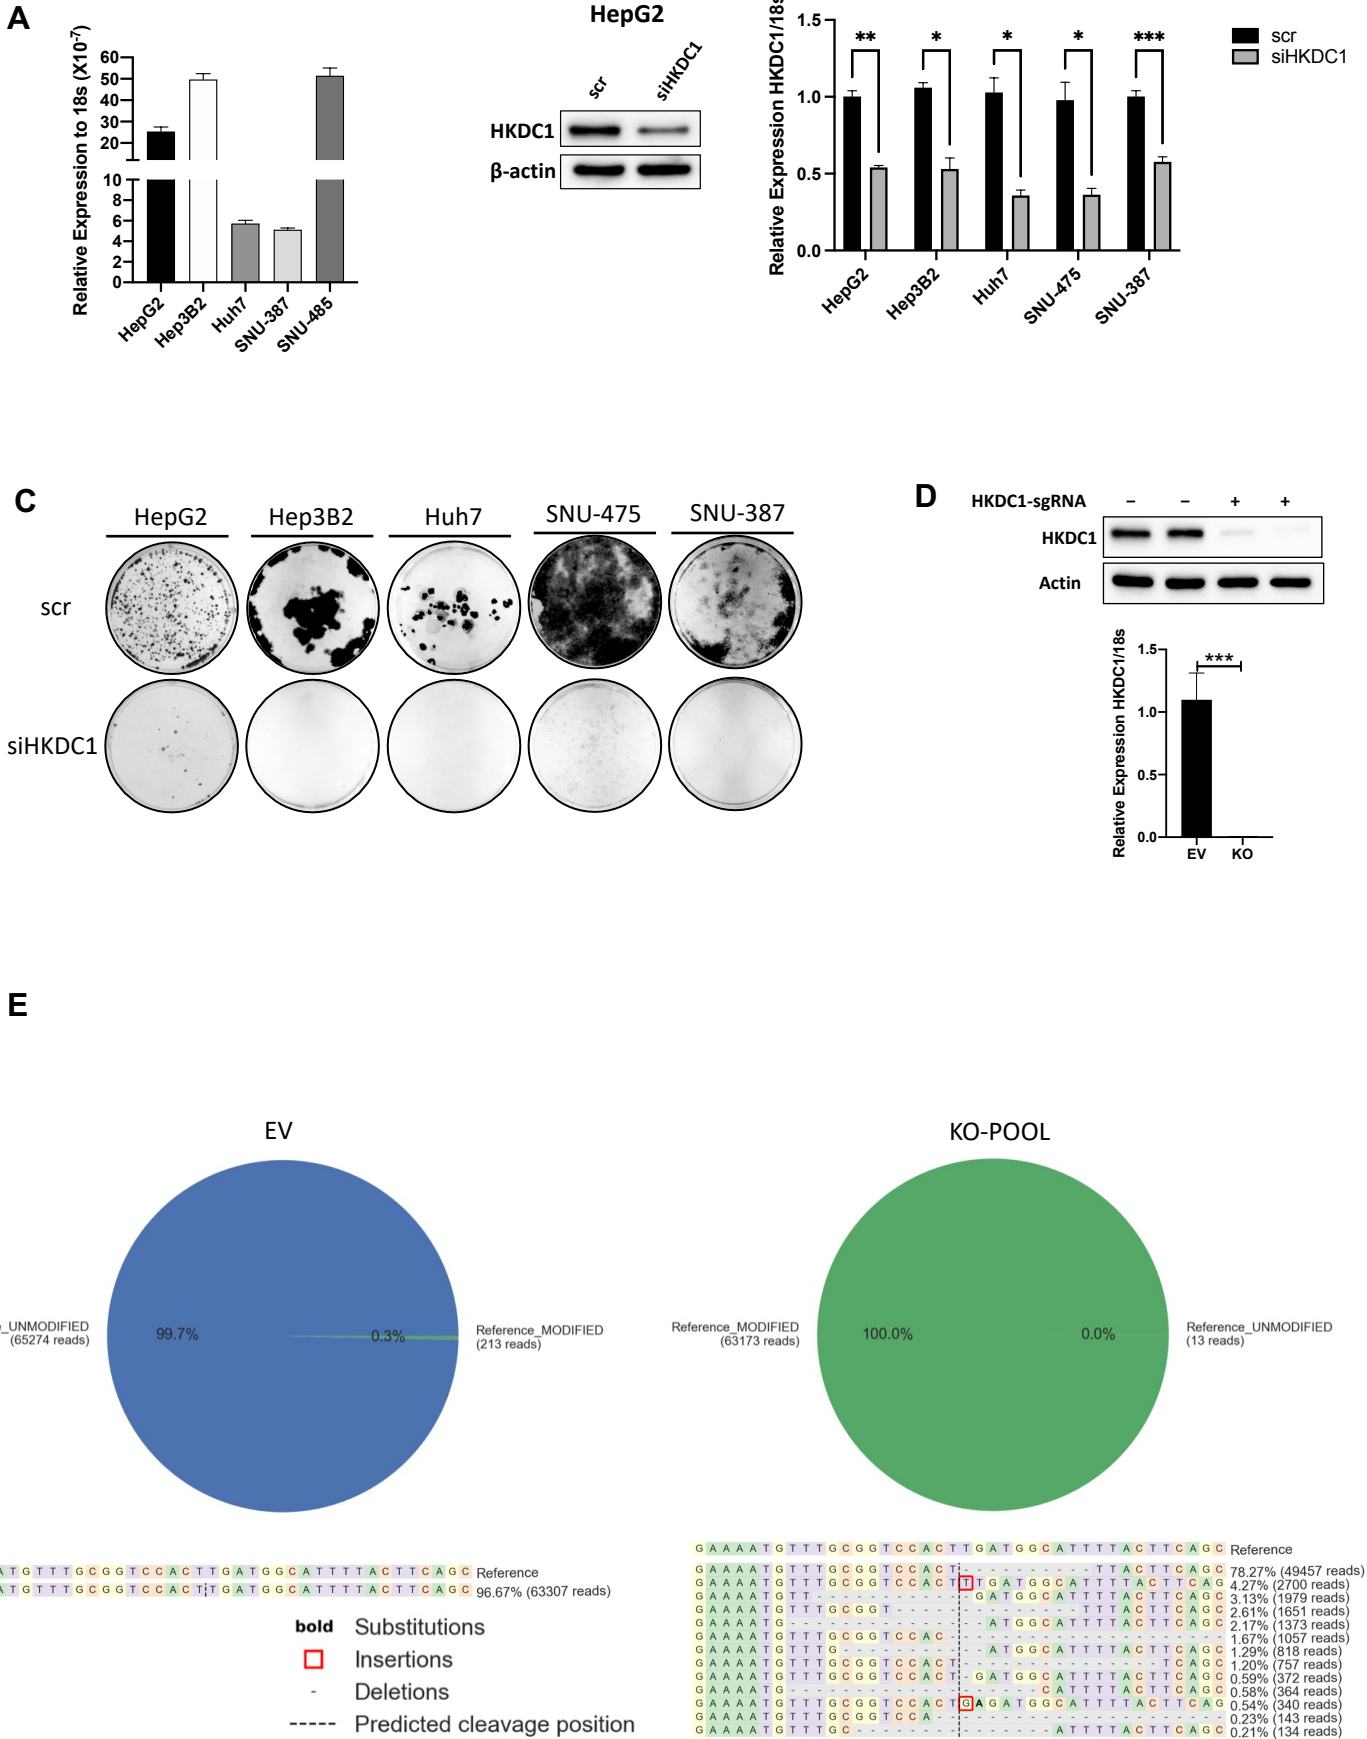

F

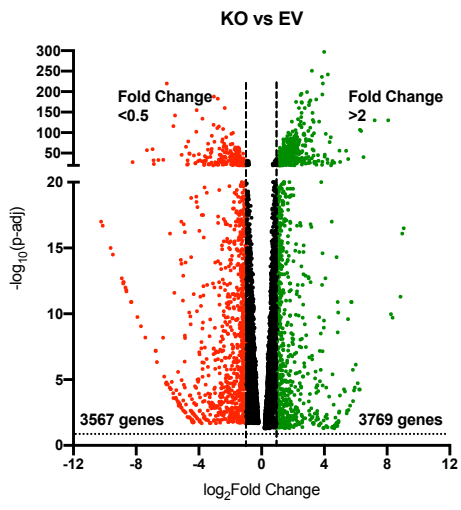

G

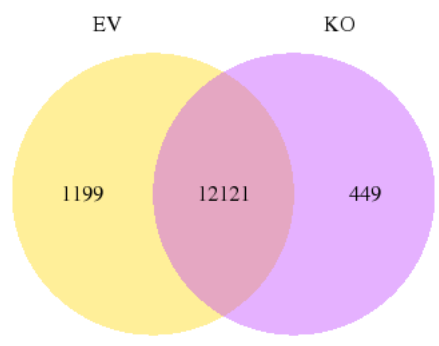

H

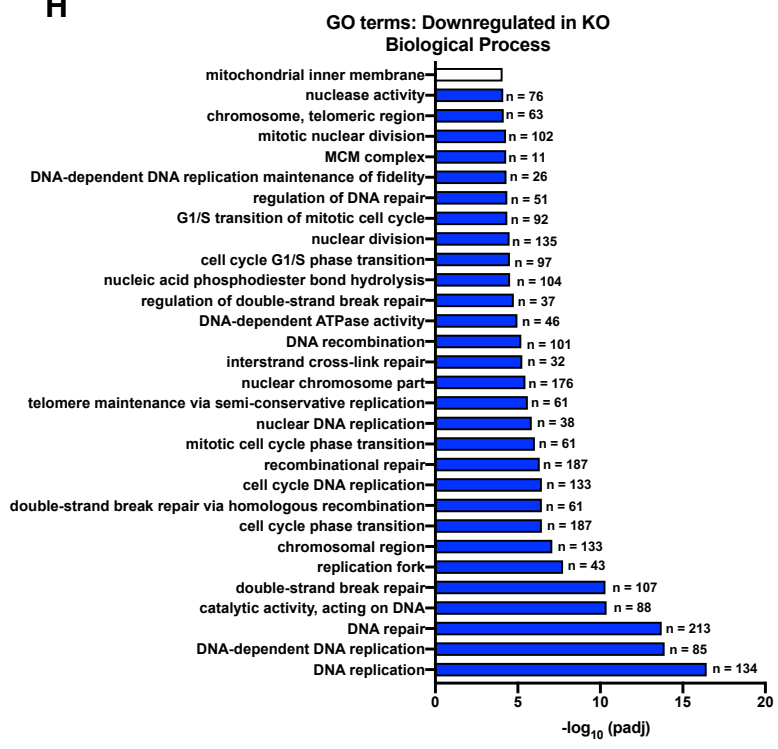

**I**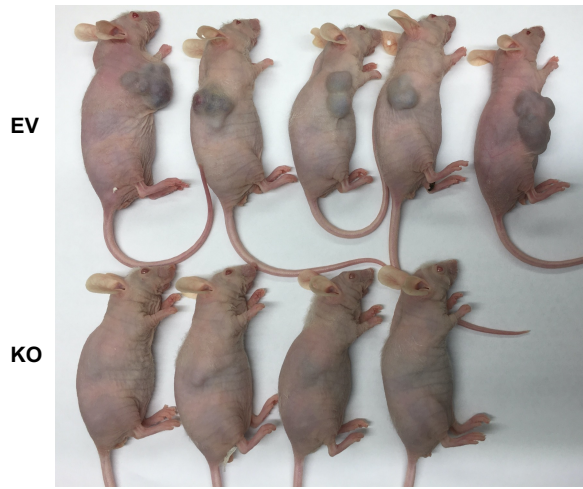**J**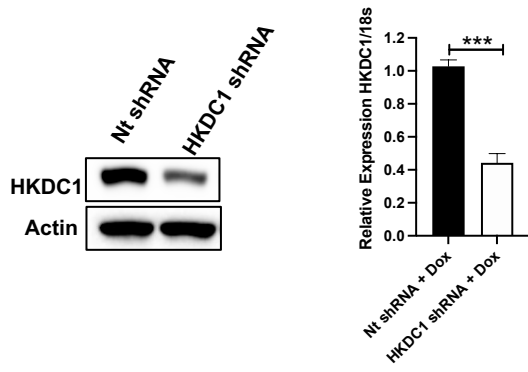**K**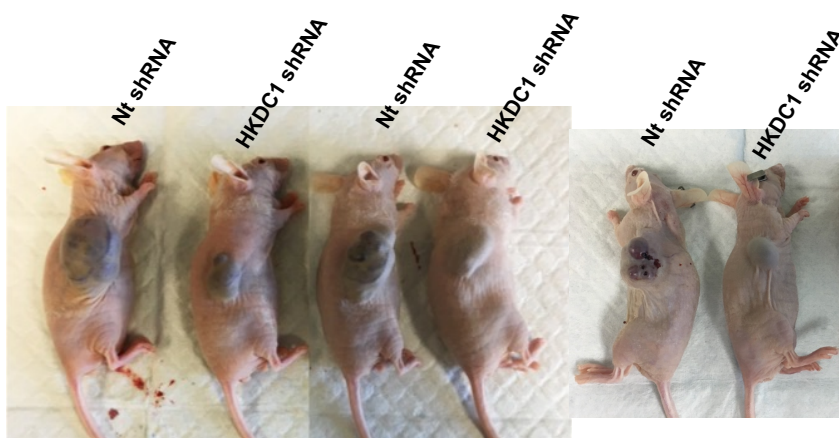



# Supplementary Fig 3

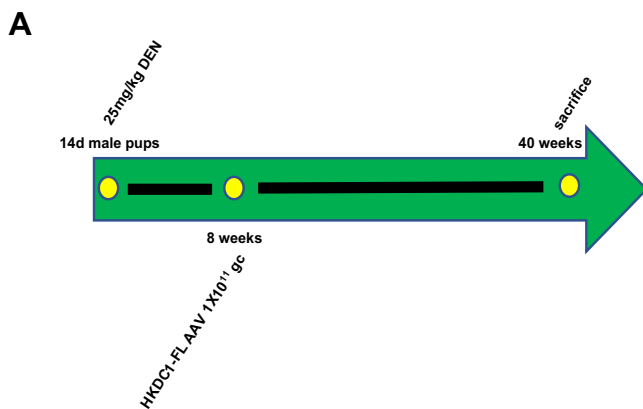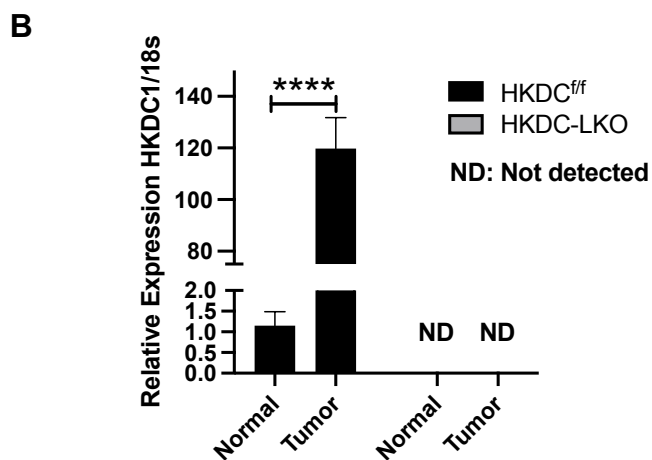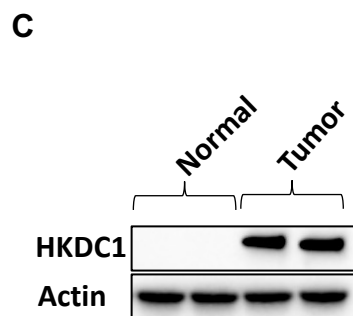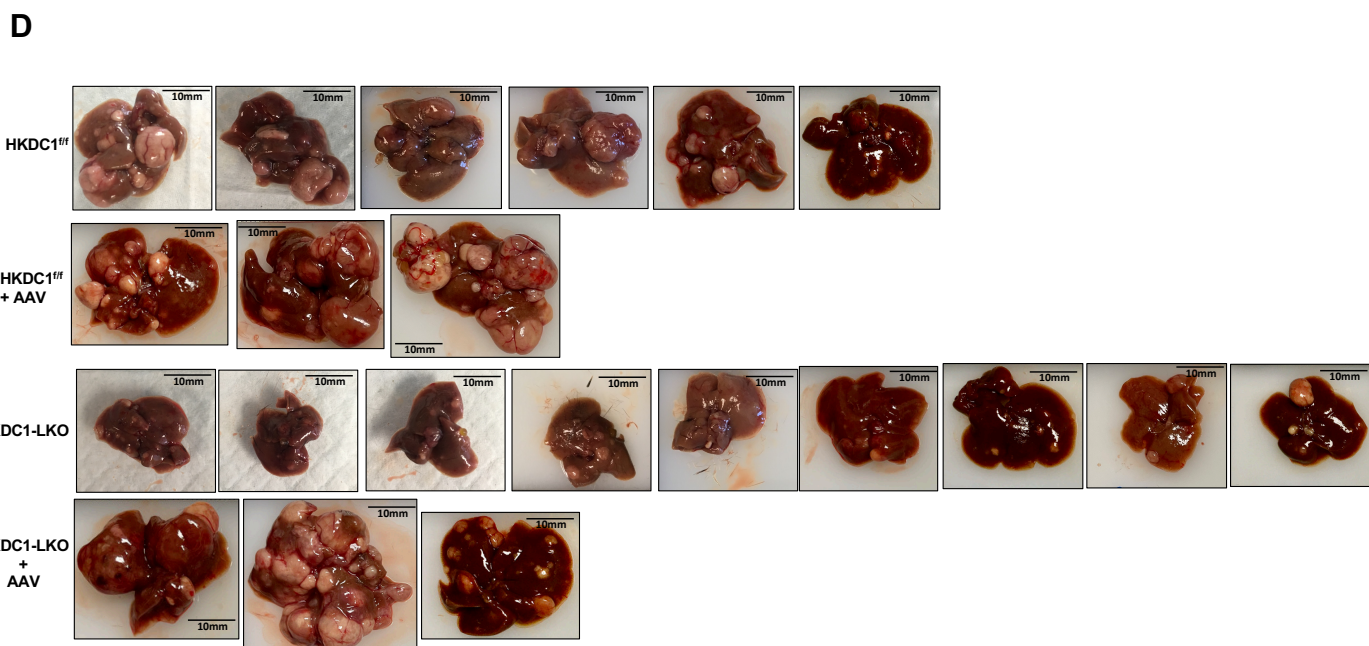

# Supplementary Fig 4

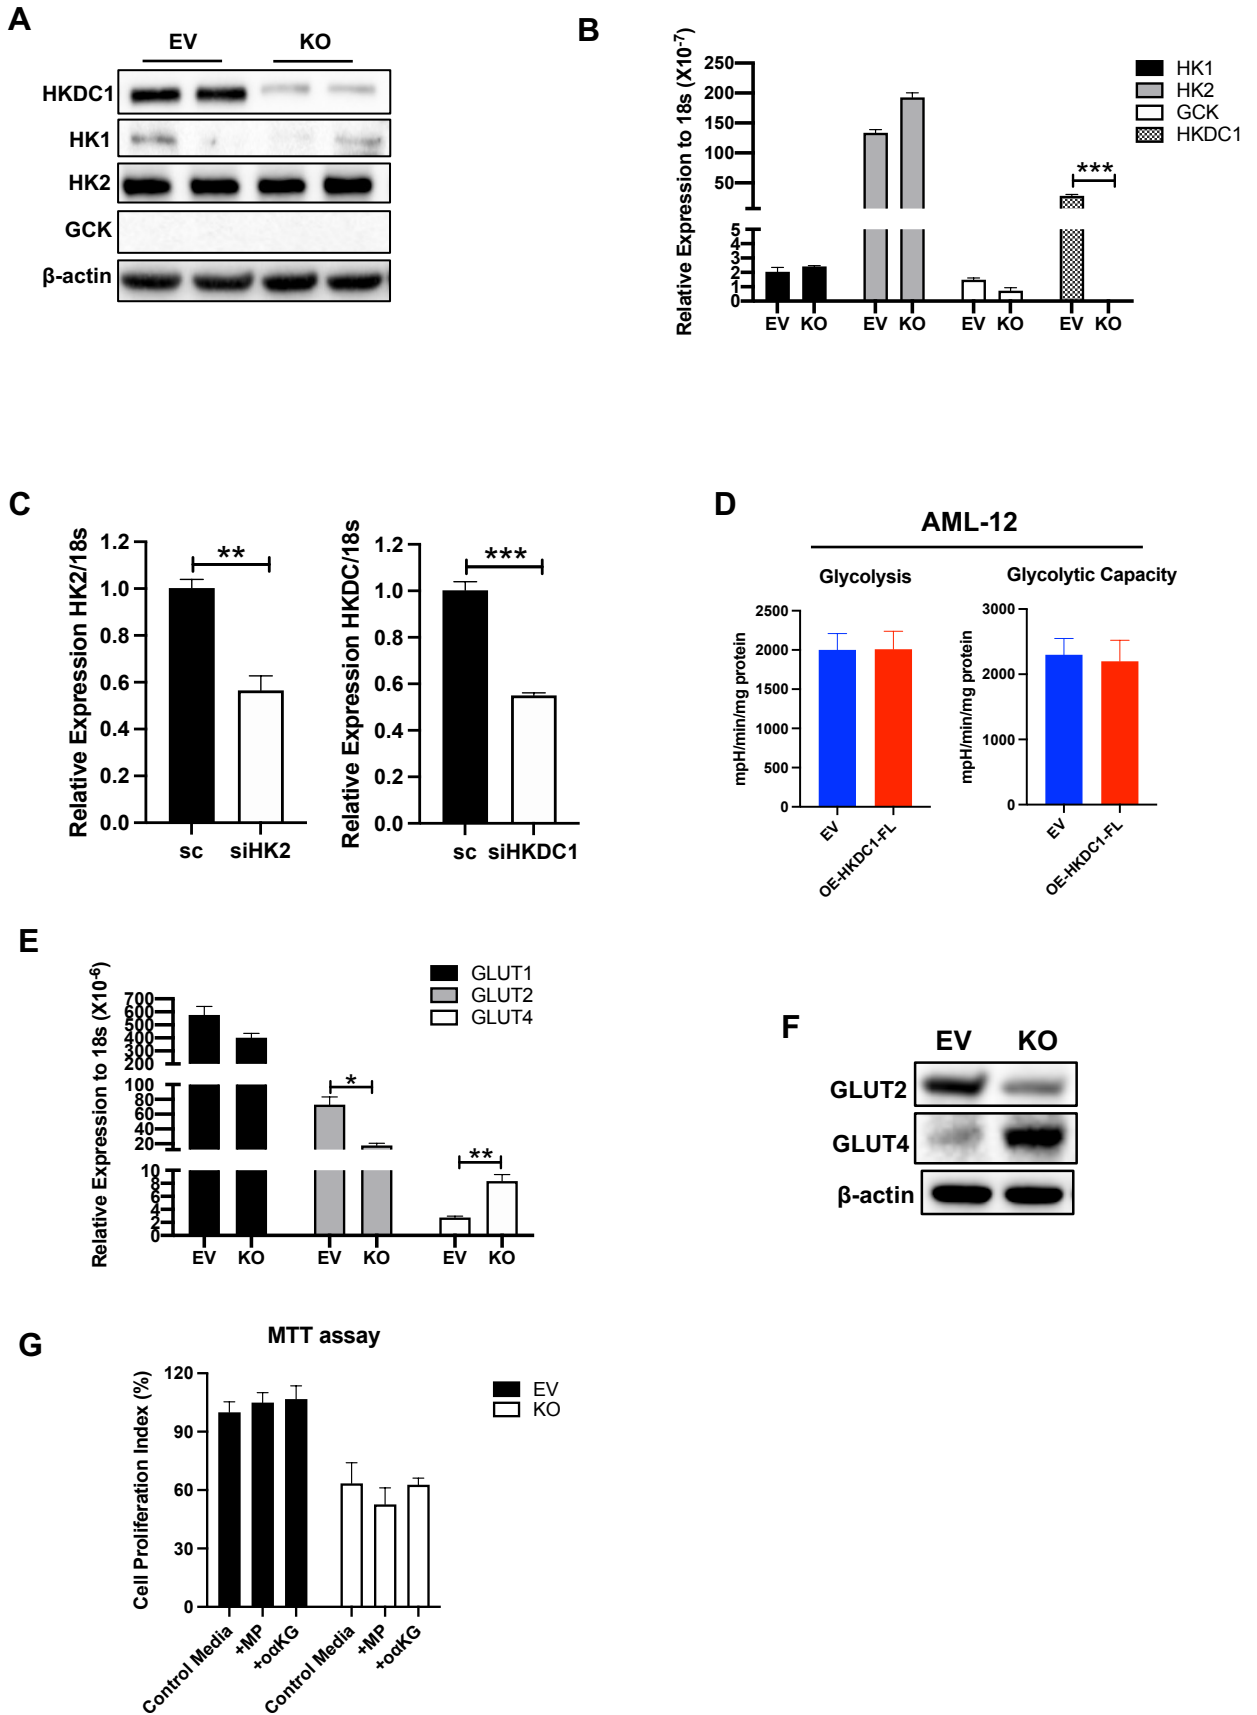

# Supplementary Fig 5

**A**

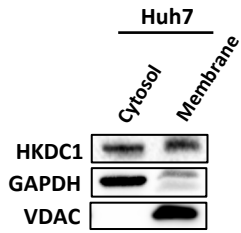

**B**

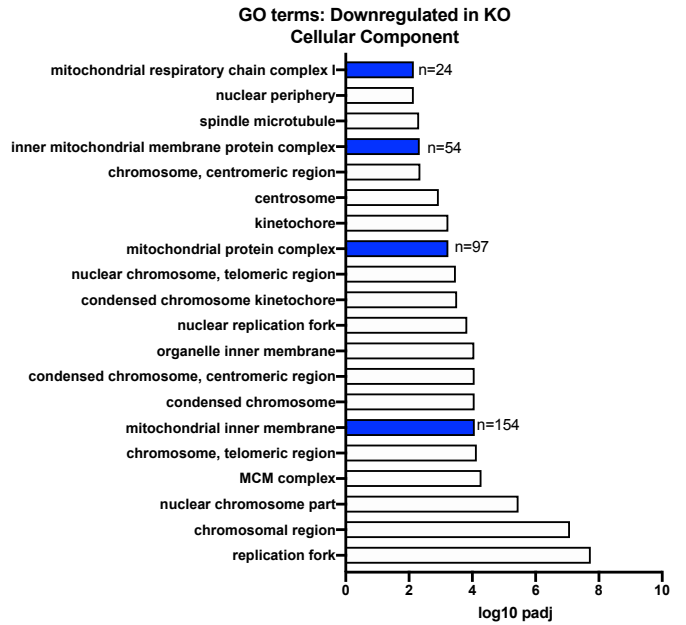

**C**

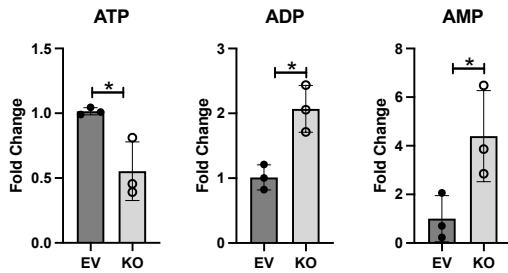

**D**

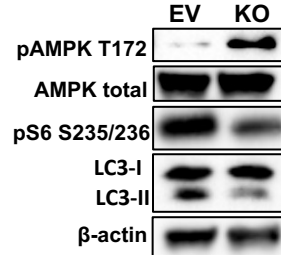

**E**

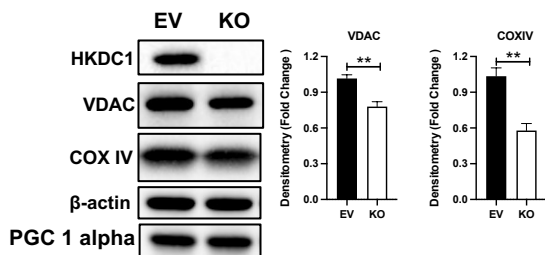

F

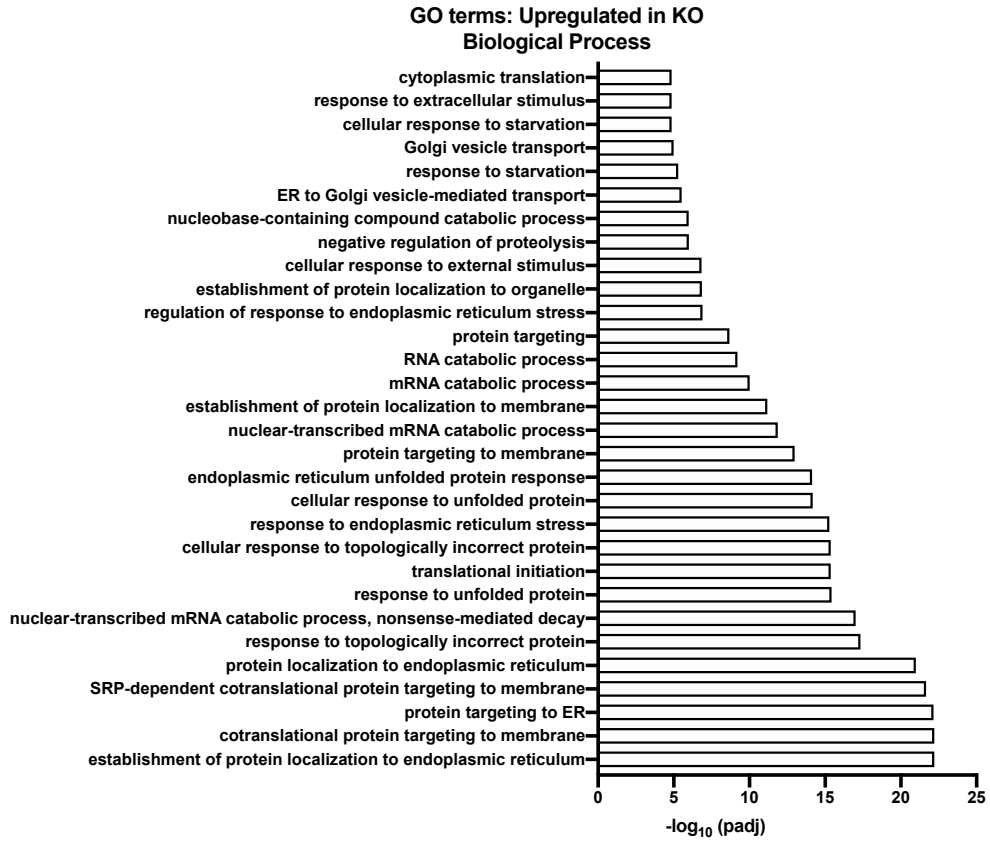

# Supplementary Fig 6

**A**

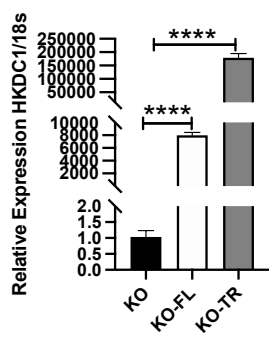

**B**

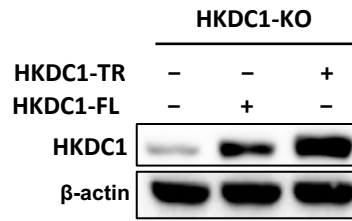

**C**

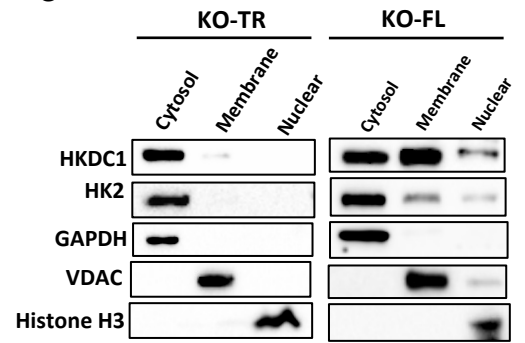

**D**

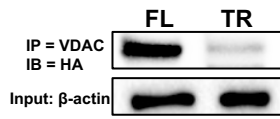

**E**

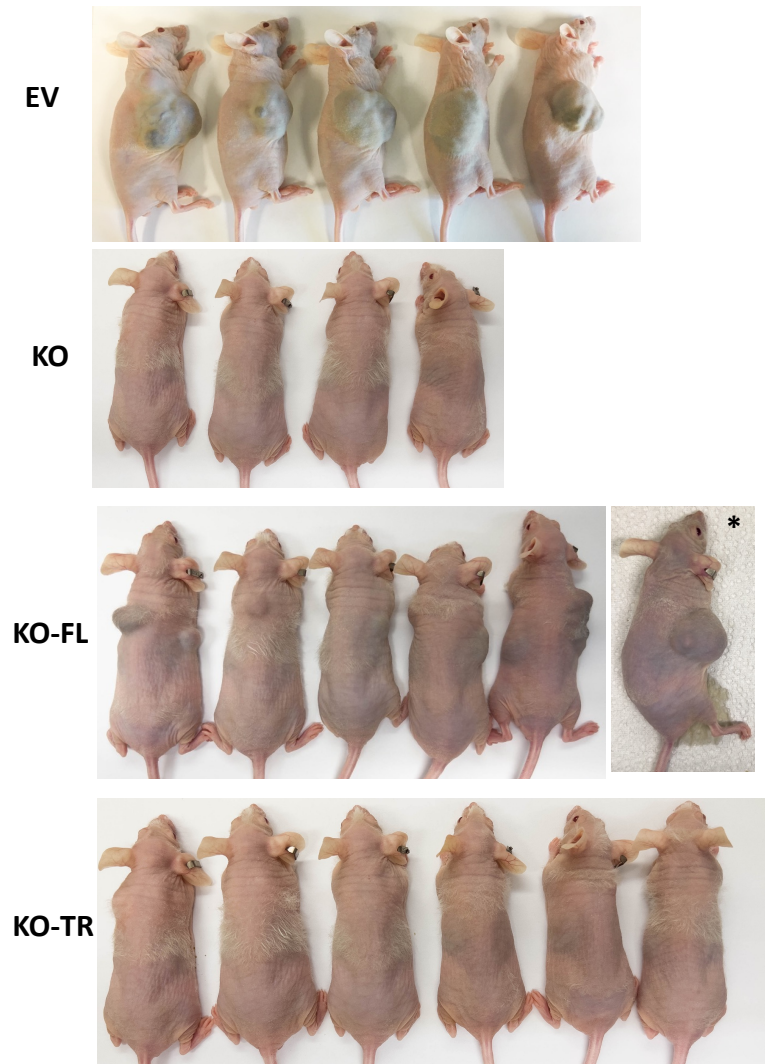

Supplement: 41419_2022_4999_MOESM2_ESM.pdf [file 41419_2022_4999_MOESM2_ESM.pdf]
