# Supplementary material for: The hexokinase “HKDC1” interaction with the mitochondria is essential for liver cancer progression
Source: PubMed Central journal article supplement (PMC9334634; doi:10.1038/s41419-022-04999-z), 2022-07-28
Supplement: 41419_2022_4999_MOESM7_ESM.pdf [file 41419_2022_4999_MOESM7_ESM.pdf]

# DECLARATION OF CONTRIBUTIONS TO ARTICLE

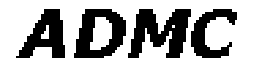

Manuscript Number:

Journal Name:

(the 'Journal')

Proposed Title of the Contribution:

(the 'Contribution')

Author(s):

(the 'Authors')

For all *CDD* articles, each person named as an author in the published version must be able to show he or she has contributed substantially to the article.

Authorship credit should be based on 1) substantial contributions to conception and design, acquisition of data, or analysis and interpretation of data; 2) drafting the article or revising it critically for important intellectual content; and 3) final approval of the version to be published. Authors should meet conditions 1, 2 and 3.

Any person who cannot be shown to have made a substantial contribution to the article cannot be listed as an author in the final version. The name of any person who is deemed to have made a minor contribution can, however, appear in the Acknowledgments section of the article.

Please complete the table below to indicate the contributions of all named authors to the manuscript.

| Author Full Name: | Specification of Contribution to the Manuscript:                                                    |
|-------------------|-----------------------------------------------------------------------------------------------------|
|                   | designed and performed experiments, analyzed, and interpreted the results, and wrote the manuscript |
|                   |                                                                                                     |
|                   |                                                                                                     |
|                   |                                                                                                     |
|                   |                                                                                                     |
|                   |                                                                                                     |
|                   |                                                                                                     |
|                   |                                                                                                     |
|                   | designed the project, analyzed, and interpreted the data, and wrote the manuscript.                 |
|                   |                                                                                                     |
|                   |                                                                                                     |
|                   |                                                                                                     |
|                   |                                                                                                     |
|                   |                                                                                                     |
|                   |                                                                                                     |

Please complete the table below to indicate the contributions of all named authors to the figures.

Figure 1:

|  |
|--|
|  |
|--|

Figure 2:

|  |
|--|
|  |
|--|

Figure 3:

|  |
|--|
|  |
|--|

Figure 4:

|  |
|--|
|  |
|--|

Figure 5:

|  |
|--|
|  |
|--|

Figure 6:

|  |
|--|
|  |
|--|

Signed for and on behalf of the Author(s):

*Brian Layden*

Print Name:

|  |
|--|
|  |
|--|

Date:

|  |
|--|
|  |
|--|
